# Supplementary material for: Iron(ii) complexes of tris(2-pyridylmethyl)amine (TPMA) and neutral bidentate ligands showing thermal- and photo-induced spin crossover
Source: Royal Society of Chemistry journal article supplement (doi:10.1039/c8dt01425f), 2018-01-01
Supplement: c8dt01425f1.pdf [file c8dt01425f1.pdf]

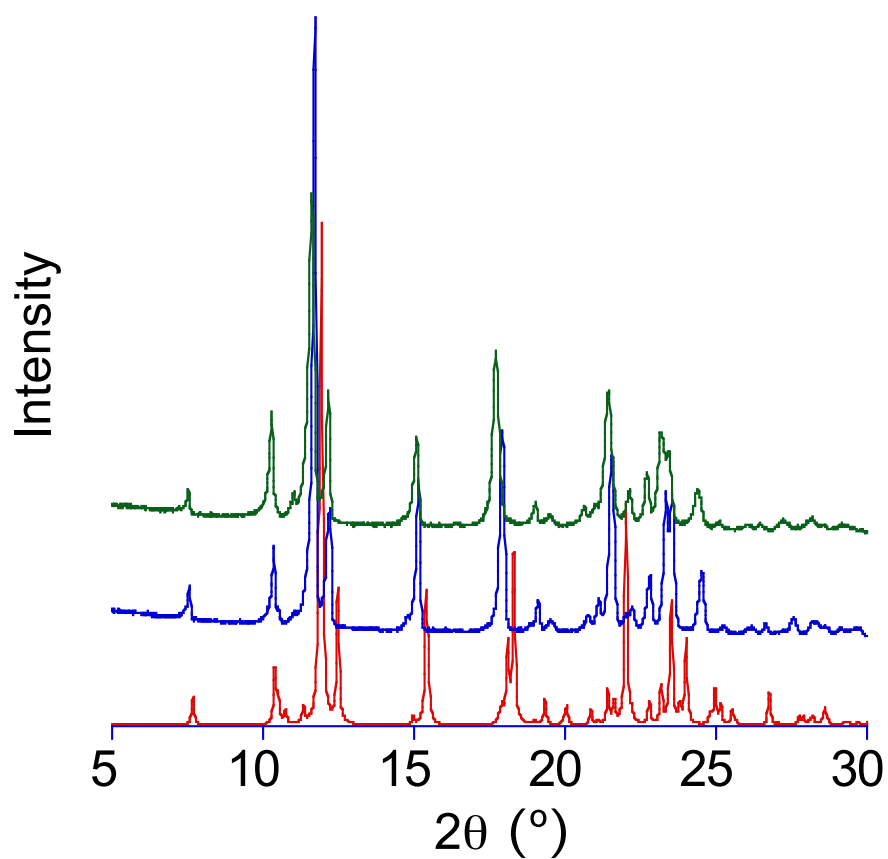

**Fig. S1** Powder X ray diffraction pattern for crystals of **1** (blue) and **3** (green) and simulated one (red) from the structure of **1** at 120 K.

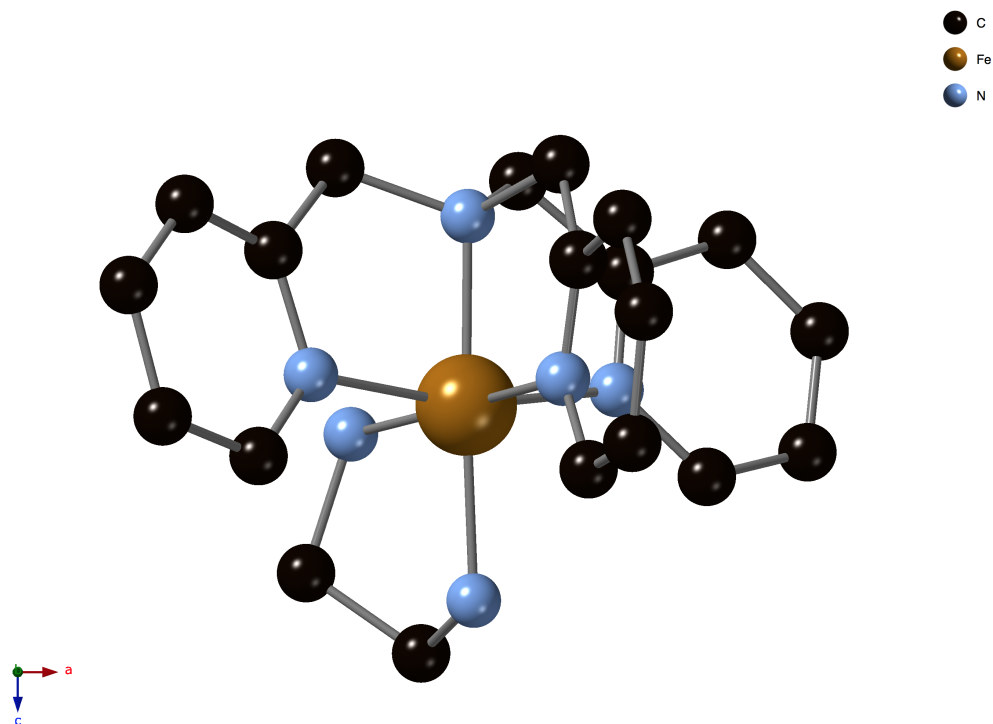

(a)

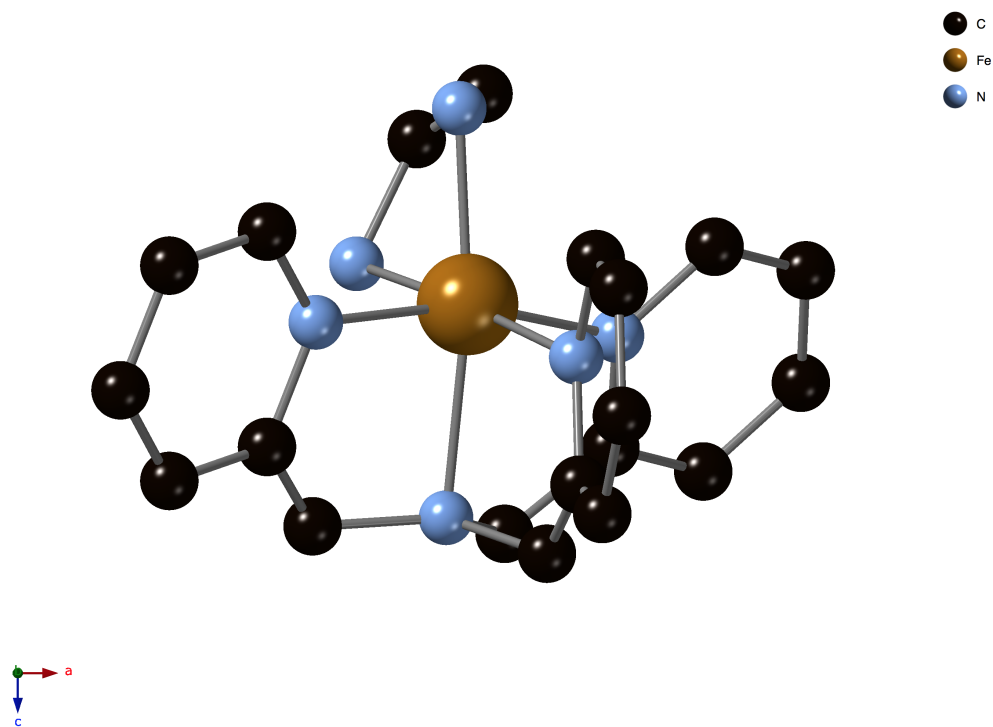

(b)

**Fig. S2** Two possible configurations of  $[\text{Fe}^{\text{II}}(\text{TPMA})(\text{en})]^{2+}$  complex in **1** at 120 K with 0.85 (a) and 0.15 (b) occupancies. (C (black), N(blue), and Fe(brown)). Hydrogen atoms have been omitted for clarity.

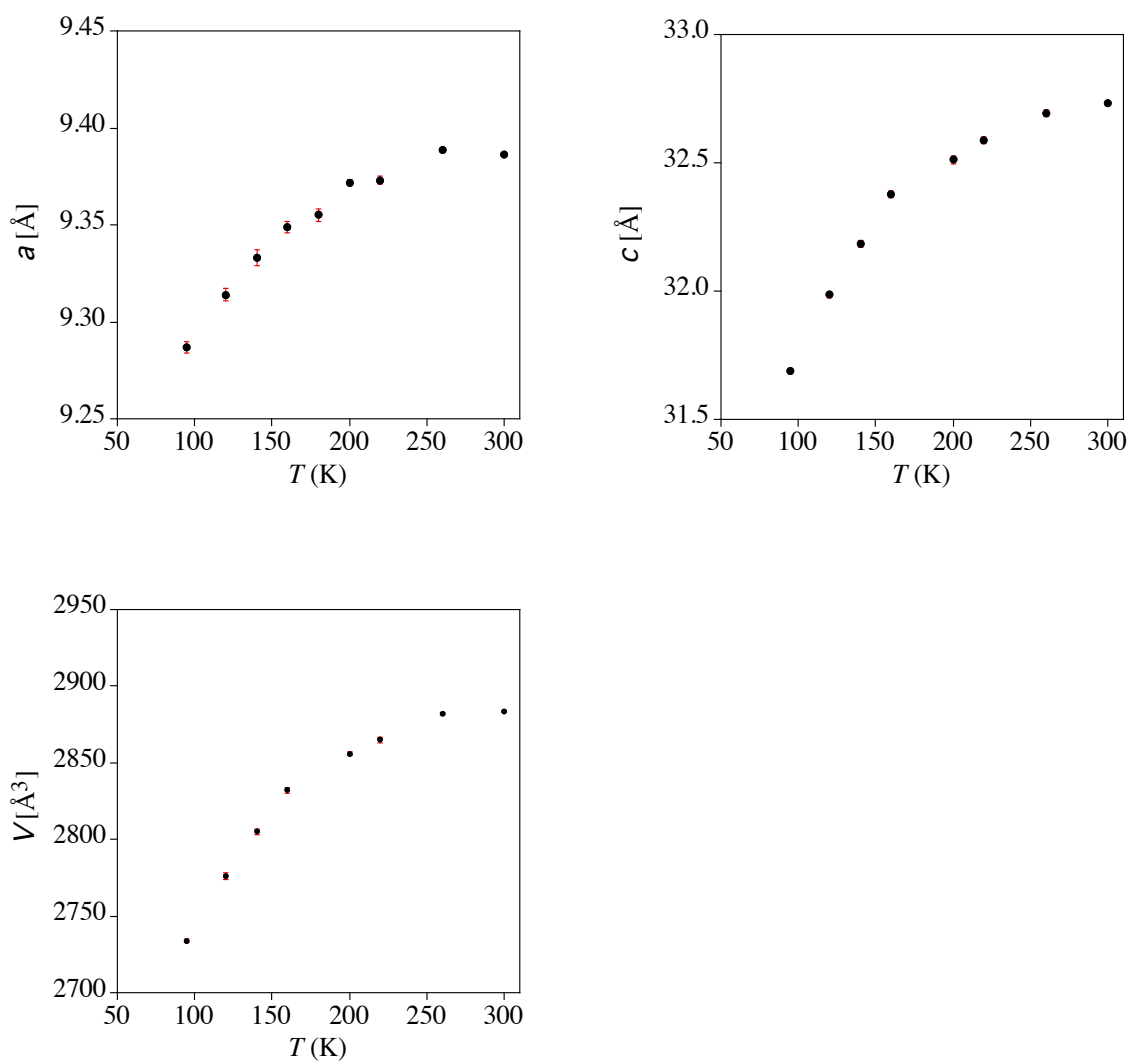

**Fig. S3** Unit cell parameters of **2** at different temperatures calculated from single crystal X-ray diffraction data.

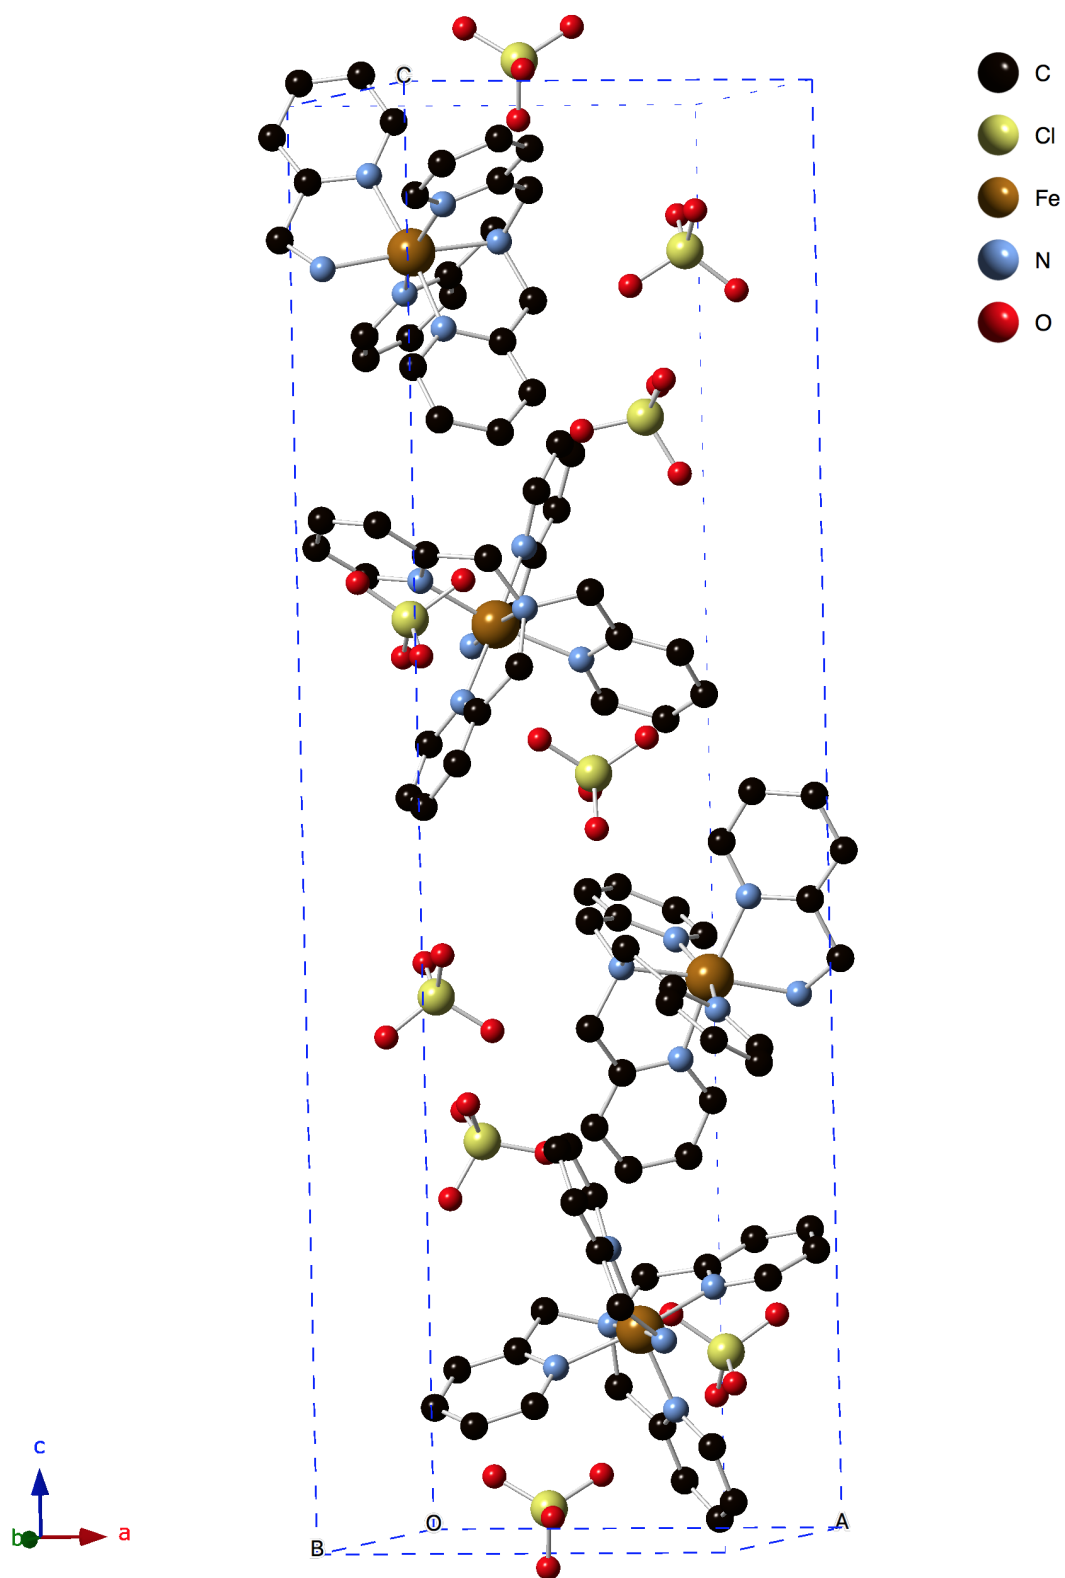

(a)

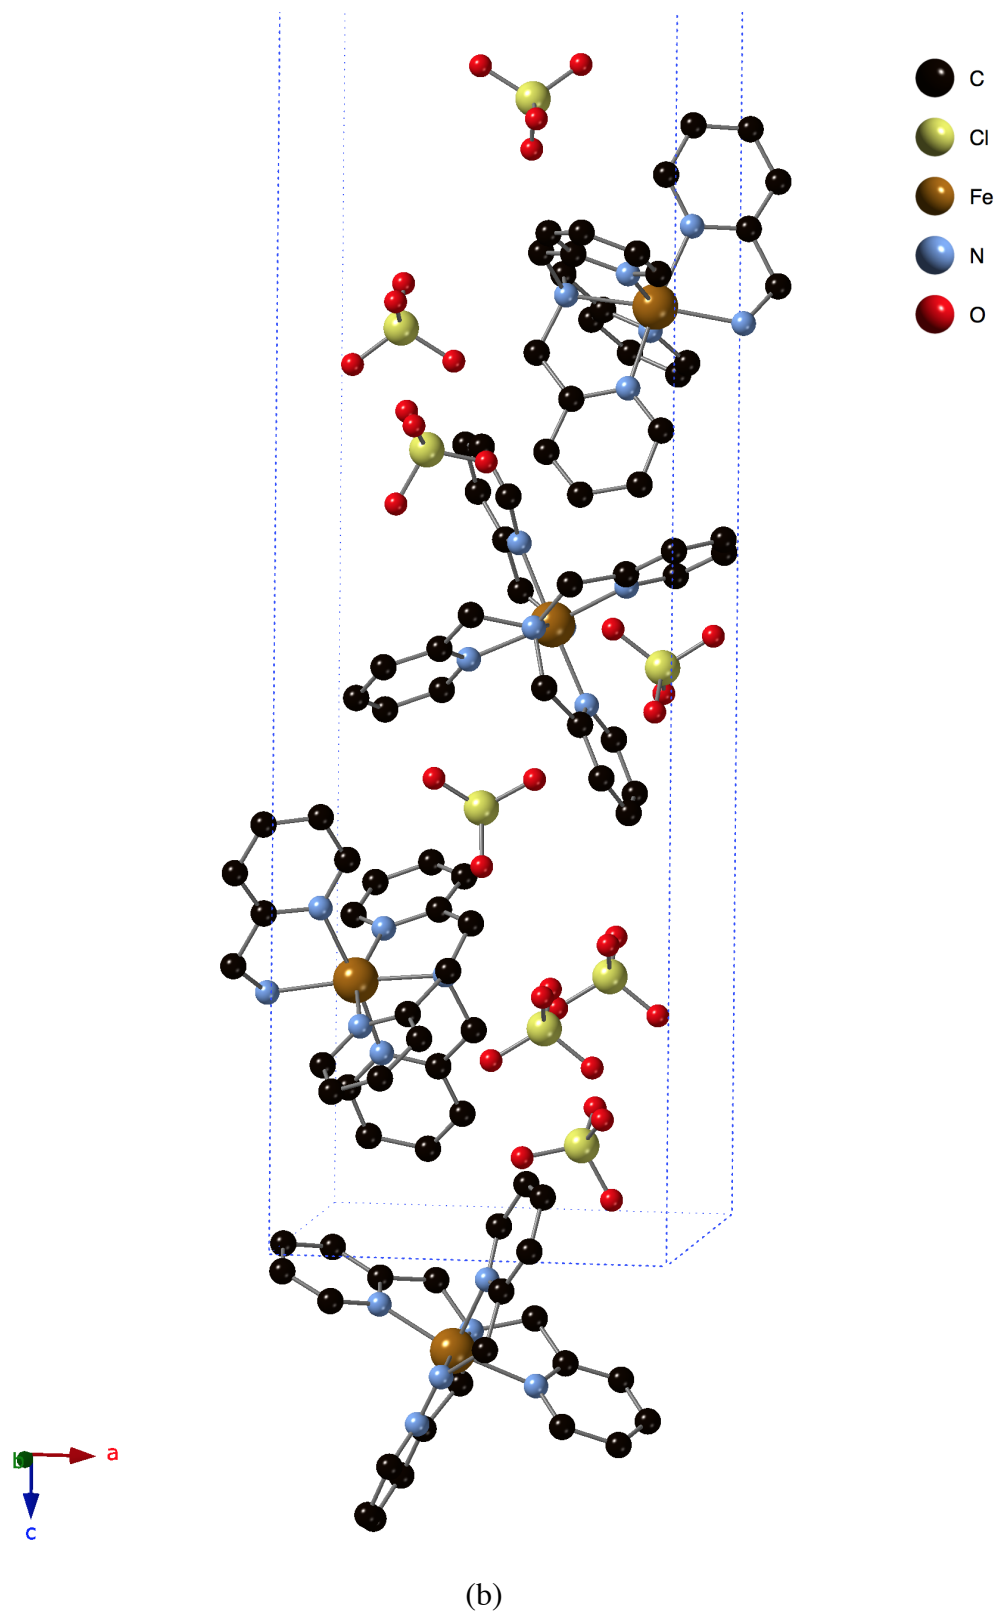

**Fig. S4** Views of the helices of  $[\text{Fe}^{\text{II}}(\text{TPMA})(2\text{-pic})]^{2+}$  complexes of opposite helicity in the structure of **2** in crystals solved as  $P4_1$  at 90 K (a) and as  $P4_3$  at 120 K (b).

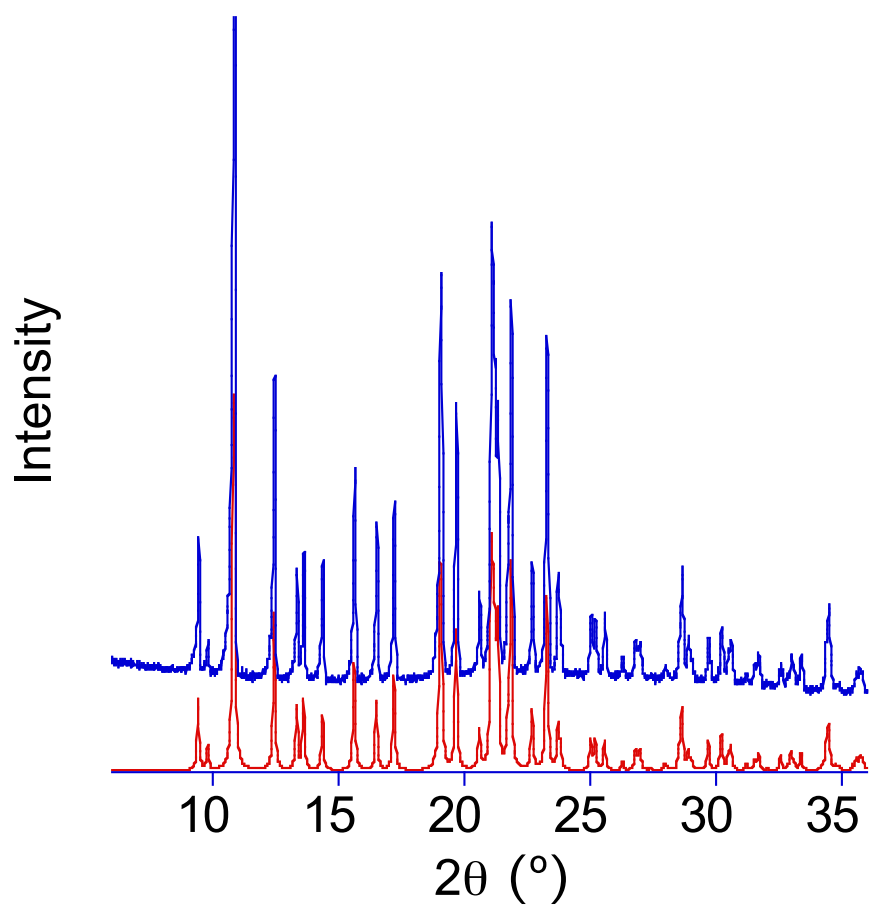

**Fig. S5** Powder X ray diffraction pattern for crystals of **2** (blue) and simulated one (red) from the structure of **2** at 300 K.
